# Supplementary material for: Digestive and locomotor capacity show opposing responses to changing food availability in an ambush predatory fish
Source: Oxford University Press journal article supplement (doi:10.1242/jeb.173187), 2018-01-01
Supplement: jeb173187supp.pdf [file jeb173187supp.pdf]

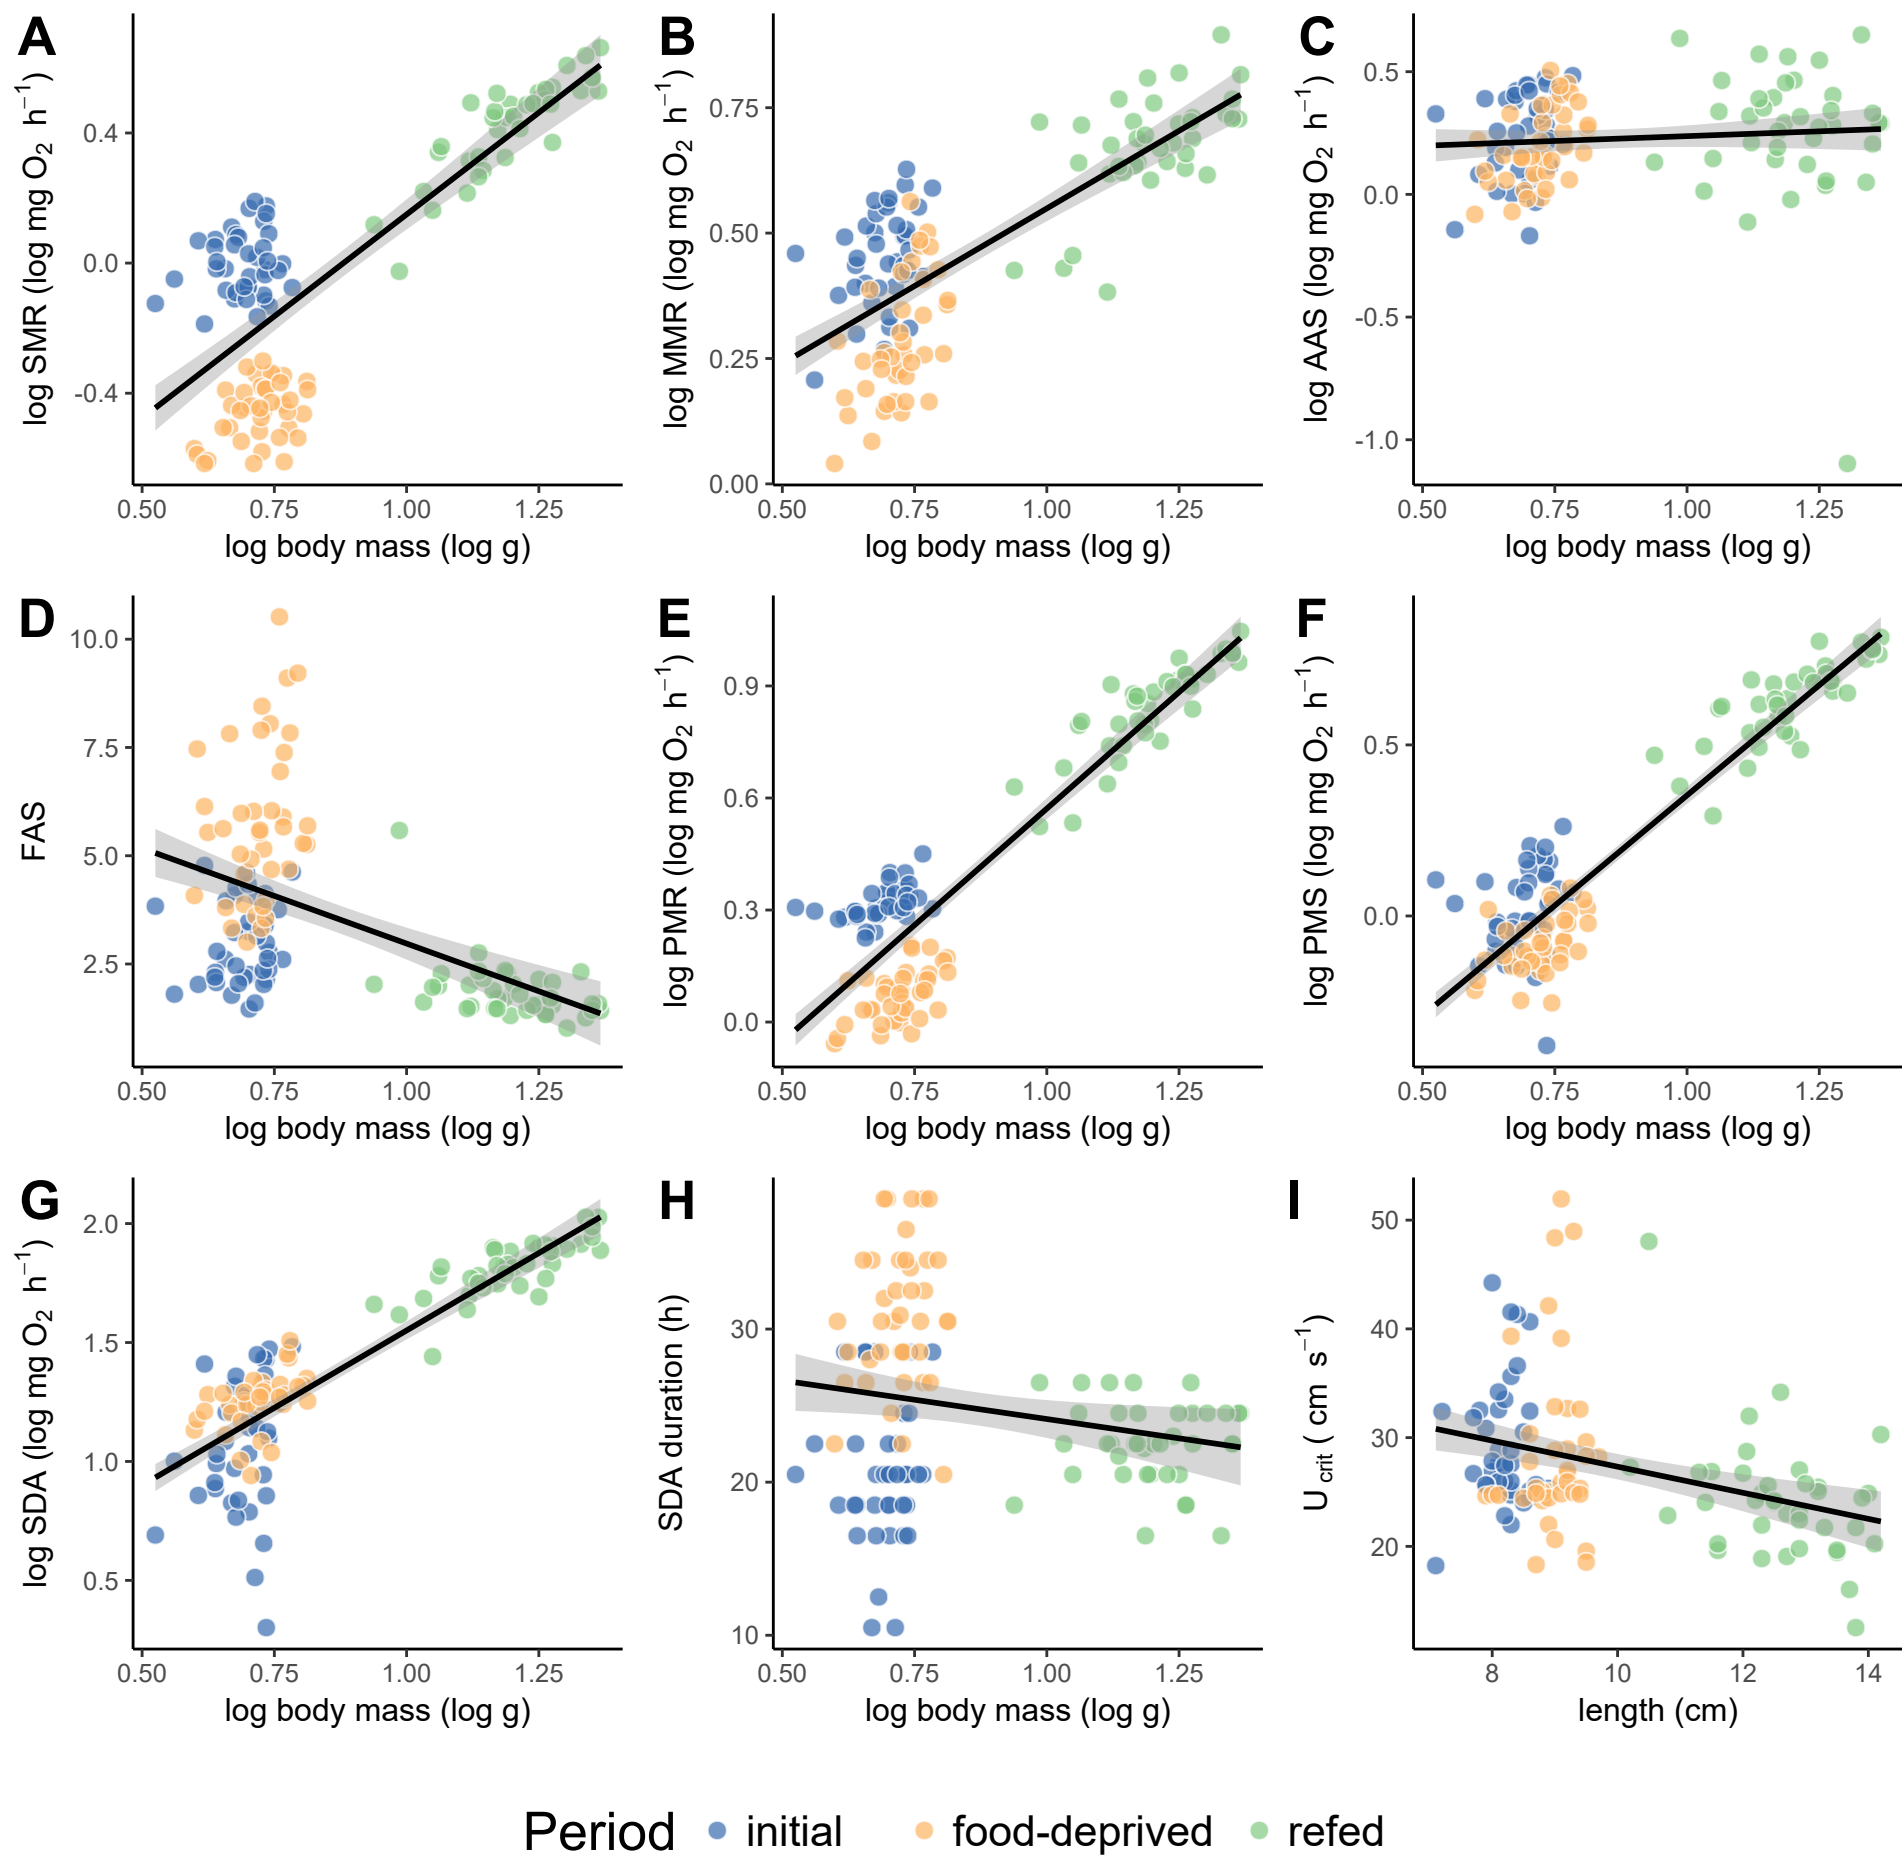

**FIGURE S1.** Correlations among metabolic traits and indices of digestive and locomotor function for Southern catfish under conditions of normal feeding (blue), after 15 days of food deprivation (yellow), and 15 days after resuming normal feeding (green). For illustrative purposes, solid lines represent linear regressions; shaded areas around lines represent the 95% confidence intervals. Regression equations are as follows and were used to produce residuals for standardization to a common body mass for visual presentation of data in figures:  $\log \text{SMR} = -1.103 + 1.252(\log \text{mass})$ ,  $r^2 = 0.65$ ,  $p < 0.0001$ ;  $\log \text{MMR} = -0.0696 + 0.6187(\log \text{mass})$ ,  $r^2 = 0.60$ ,  $p < 0.0001$ ;  $\log \text{AAS} = 0.159 + 0.0787(\log \text{mass})$ ,  $r^2 = 0.008$ ,  $p = 0.333$ ;  $\text{FAS} = 7.376 - 4.404(\log \text{mass})$ ,  $r^2 = 0.27$ ,  $p < 0.0001$ ;  $\log \text{PMR} = -0.676 + 1.247(\log \text{mass})$ ,  $r^2 = 0.83$ ,  $p < 0.0001$ ;  $\log \text{PMS} = -0.936 + 1.288(\log \text{mass})$ ,  $r^2 = 0.87$ ,  $p < 0.0001$ ;  $\log \text{SDA} = 0.249 + 1.302(\log \text{mass})$ ,  $r^2 = 0.75$ ,  $p < 0.0001$ ;  $\text{SDA duration} = 29.162 - 5.039(\log \text{mass})$ ,  $r^2 = 0.04$ ,  $p = 0.029$ ;  $U^{\text{crit}} = 39.322 - 1.199(\text{length})$ ,  $r^2 = 0.12$ ,  $p < 0.0001$ .

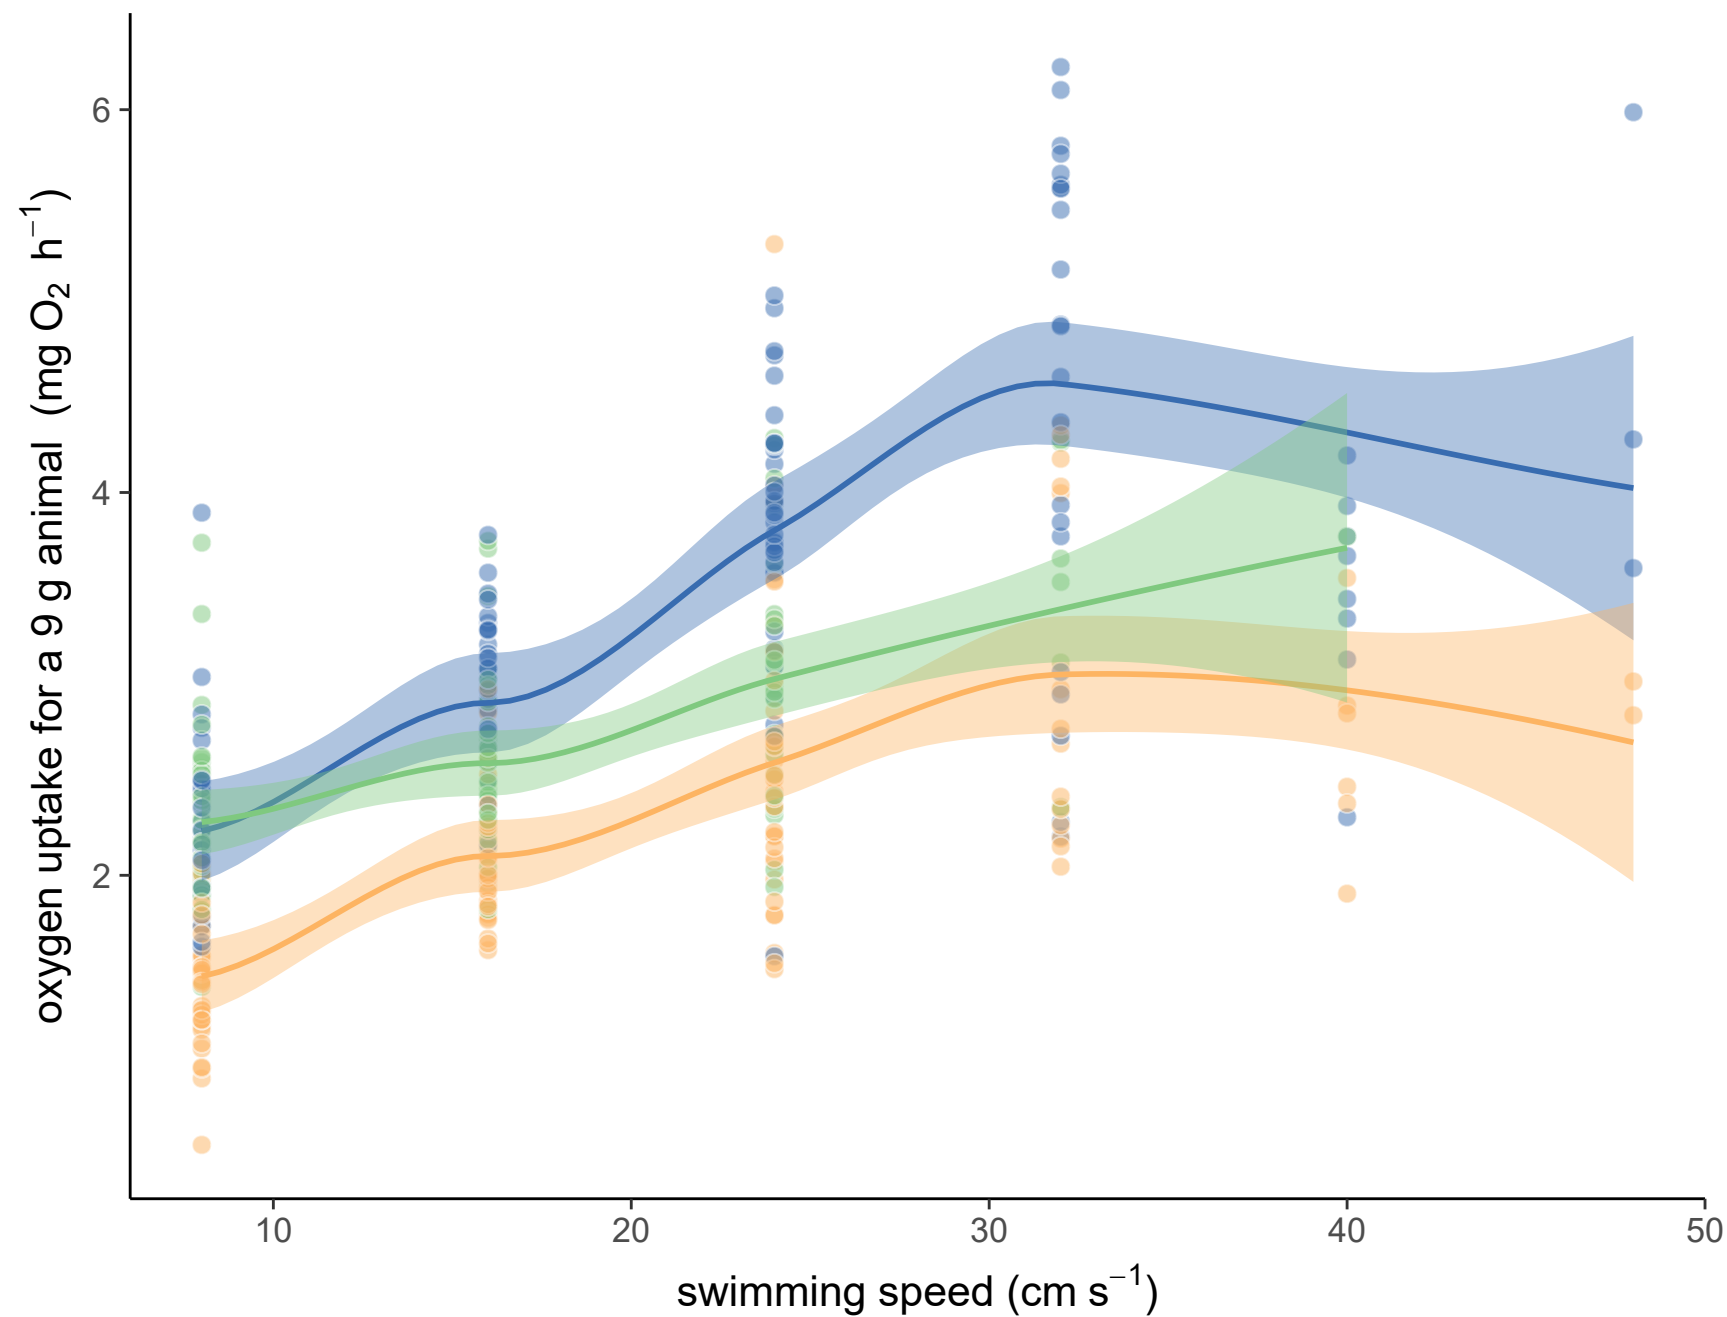

**FIGURE S2.** Changes in oxygen uptake with swimming speed of Southern catfish under conditions of normal feeding (blue), after 15 days of food deprivation (yellow), and after 15 days of normal feeding (green). Data corresponds to Figure 3 but are expressed here in terms of absolute swimming speed ( $\text{cm s}^{-1}$ ). Each fish was measured under each condition; each data point is data for an individual at a given speed. Rates of oxygen uptake are adjusted to a common body mass of 9 g (the mean mass of all individuals during measurement across the duration of the study). For illustrative purposes, solid lines represent linear regressions; see Table S3 for parameters and results of statistical models. Shaded areas around lines represent the 95% confidence intervals.

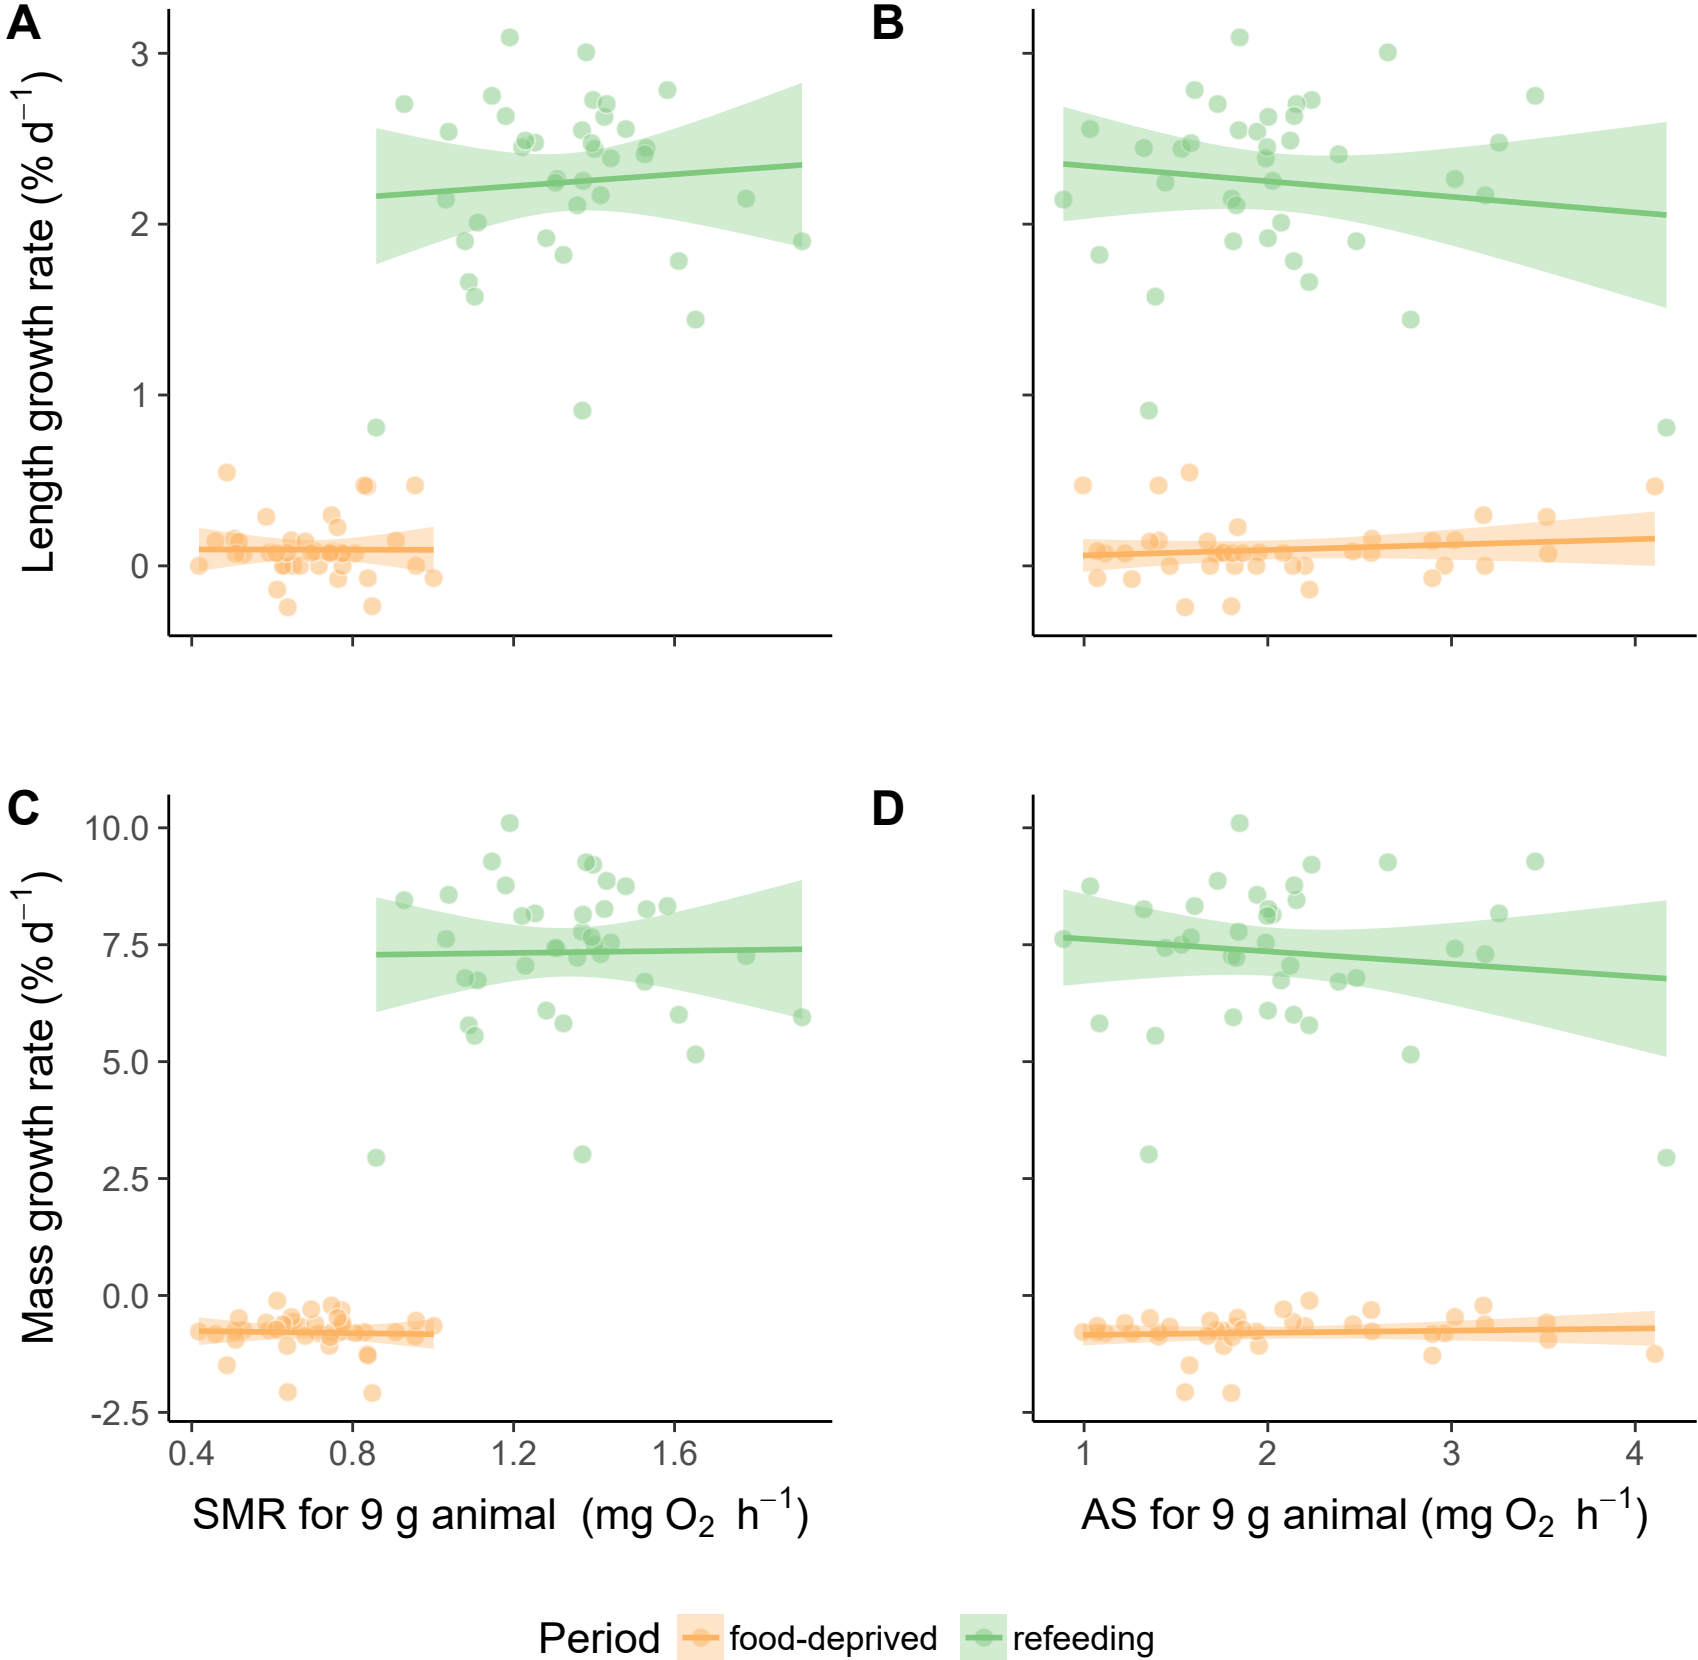

**FIGURE S3.** Relationships between growth rate and either standard metabolic rate (SMR) and aerobic scope (AS) in Southern catfish. (A) and (B) depict length specific growth rates; (C) and (D) depict mass specific growth rates. Growth rates were measured during 15 days of food deprivation followed by 15 days of refeeding. Each fish was measured under each condition; each data point is data for an individual during a given feeding period. Rates of oxygen uptake are adjusted to a common body mass of 9 g (the mean mass of all individuals during measurement across the duration of the study). For illustrative purposes, solid lines represent linear regressions; shaded areas around lines represent the 95% confidence intervals.

**TABLE S1.** Results of linear mixed effects models examining the effects of feeding period on traits associated with morphology and metabolism in Southern catfish (n = 40). Each individual was measured for each response variable three times: (1) initial values at the beginning of the study; (2) after 15 days of food deprivation; and (3) after another 15 days or refeeding (daily to satiation). For feeding period, the reference level is initial values for each response variable. To account for repeated measures, fish ID is included as a random effect in the model.

|                                                      | $r^2_m$     | estimate<br>$r^2_c$ | s.e.  | df     | t      | p        |
|------------------------------------------------------|-------------|---------------------|-------|--------|--------|----------|
| <b>Mass (g)</b>                                      |             |                     |       |        |        |          |
| intercept                                            |             | 5.963               | 0.352 | 110.53 | 16.92  | < 0.0001 |
|                                                      | 0.832 0.856 |                     |       |        |        |          |
| feeding period                                       |             |                     |       |        |        |          |
| fasted                                               |             | -0.663              | 0.461 | 76.69  | -1.44  | 0.154    |
| refed                                                |             | 10.215              | 0.468 | 77.79  | 21.85  | < 0.0001 |
| <b>Total Length (cm)</b>                             |             |                     |       |        |        |          |
| intercept                                            |             | 8.928               | 0.106 | 86.83  | 83.93  | < 0.0001 |
|                                                      | 0.869 0.923 |                     |       |        |        |          |
| feeding period                                       |             |                     |       |        |        |          |
| fasted                                               |             | 0.048               | 0.116 | 76.50  | 0.41   | 0.682    |
| refed                                                |             | 3.663               | 0.117 | 77.20  | 31.19  | < 0.0001 |
| <b>log SMR (log mg O<sub>2</sub> h<sup>-1</sup>)</b> |             |                     |       |        |        |          |
| intercept                                            |             | -0.770              | 0.091 | 106.68 | -8.50  | < 0.0001 |
|                                                      | 0.943 0.953 |                     |       |        |        |          |
| log mass (log g)                                     |             | 0.991               | 0.116 | 106.64 | 8.56   | < 0.0001 |
| feeding period                                       |             |                     |       |        |        |          |
| fasted                                               |             | -0.400              | 0.019 | 82.64  | -20.79 | < 0.0001 |
| refed                                                |             | 0.006               | 0.053 | 111.44 | 0.12   | 0.905    |

### log MMR (log mg O<sub>2</sub> h<sup>-1</sup>)

|                  |         |       |        |       |          |       |
|------------------|---------|-------|--------|-------|----------|-------|
| intercept        | -0.132  | 0.094 | 114.00 | -1.40 | 0.164    | 0.756 |
| 0.756            |         |       |        |       |          |       |
| log mass (log g) | 0.75301 | 0.120 | 114.00 | 6.26  | < 0.0001 |       |
| feeding period   |         |       |        |       |          |       |
| fasted           | -0.128  | 0.022 | 114.00 | -5.73 | < 0.0001 |       |
| refed            | -0.097  | 0.055 | 114.00 | -1.74 | 0.084    |       |

### log AAS (log mg O<sub>2</sub> h<sup>-1</sup>)

|                  |        |       |        |       |       |       |
|------------------|--------|-------|--------|-------|-------|-------|
| intercept        | 0.111  | 0.215 | 108.09 | 0.52  | 0.606 | 0.019 |
| 0.201            |        |       |        |       |       |       |
| log mass (log g) | 0.168  | 0.274 | 108.12 | 0.61  | 0.542 |       |
| feeding period   |        |       |        |       |       |       |
| fasted           | -0.042 | 0.045 | 82.79  | -0.94 | 0.352 |       |
| refed            | -0.061 | 0.124 | 112.15 | -0.49 | 0.626 |       |

### FAS

|                  |        |       |        |       |          |  |
|------------------|--------|-------|--------|-------|----------|--|
| Intercept        | 3.182  | 1.273 | 98.13  | 2.50  | 0.014    |  |
| 0.624 0.646      |        |       |        |       |          |  |
| log mass (log g) | -0.243 | 1.627 | 97.58  | -0.15 | 0.882    |  |
| feeding period   |        |       |        |       |          |  |
| fasted           | 2.753  | 0.289 | 83.39  | 9.54  | < 0.0001 |  |
| refed            | -1.022 | 0.745 | 106.50 | -1.37 | 0.173    |  |

SMR: standard metabolic rate (mg O<sub>2</sub> h<sup>-1</sup>); MMR: maximum metabolic rate (mg O<sub>2</sub> h<sup>-1</sup>); AAS: absolute aerobic scope (mg O<sub>2</sub> h<sup>-1</sup>); FAS: factorial aerobic scope



**TABLE S2.** Results of linear mixed effects models examining the effects of metabolic traits and feeding period on specific dynamic action and indices of aerobic capacity in Southern catfish ( $n = 40$ ). Each individual was measured for each response variable three times: (1) initial values at the beginning of the study; (2) after 15 days of food deprivation; and (3) after another 15 days or refeeding (daily to satiation). For feeding period, the reference level is initial values for each response variable. To account for repeated measures, fish ID is included as a random effect in the model.

|                                                                   | $r^2_m$ | estimate<br>$r^2_c$ | s.e.   | df     | t     | p                  |
|-------------------------------------------------------------------|---------|---------------------|--------|--------|-------|--------------------|
| <b>SDA (mg O<sub>2</sub>)</b>                                     |         |                     |        |        |       |                    |
| intercept                                                         |         | -33.372             | 9.529  | 79.48  | -3.50 | < 0.0001 0.94 0.94 |
| log mass (log g)                                                  |         | 58.696              | 13.246 | 89.85  | 4.43  | < 0.0001           |
| log SMR (log mg O <sub>2</sub> h <sup>-1</sup> )                  |         | -71.006             | 10.767 | 109.23 | -6.60 | < 0.0001           |
| log MMR (log mg O <sub>2</sub> h <sup>-1</sup> )                  |         | 4.408               | 6.426  | 107.18 | 0.69  | 0.494              |
| feeding period                                                    |         |                     |        |        |       |                    |
| fasted                                                            | 0.733   | 5.530               | 109.16 | 0.13   | 0.895 |                    |
| refed                                                             | 5.435   | 3.957               | 108.16 | 1.37   | 0.172 |                    |
| log SMR (log mg O <sub>2</sub> h <sup>-1</sup> ) x feeding period |         |                     |        |        |       |                    |
| fasted                                                            |         | 54.642              | 15.901 | 108.84 | 3.44  | < 0.001            |
| refed                                                             |         | 123.464             | 14.367 | 109.60 | 8.59  | < 0.0001           |
| <b>SDA duration (h)</b>                                           |         |                     |        |        |       |                    |
| intercept                                                         |         | 18.519              | 5.684  | 88.66  | 3.26  | 0.001 0.62 0.67    |
| log mass (log g)                                                  |         | 1.009               | 7.832  | 97.28  | 0.13  | 0.898              |
| log SMR (log mg O <sub>2</sub> h <sup>-1</sup> )                  |         | -31.575             | 6.146  | 106.24 | -5.14 | < 0.0001           |
| log MMR (log mg O <sub>2</sub> h <sup>-1</sup> )                  |         | 3.223               | 3.651  | 103.10 | 0.88  | 0.379              |
| feeding period                                                    |         |                     |        |        |       |                    |
| fasted                                                            |         | 18.200              | 3.156  | 106.28 | 5.77  | < 0.0001           |
| refed                                                             |         | 1.208               | 2.292  | 109.67 | 0.53  | 0.599              |
| log SMR (log mg O <sub>2</sub> h <sup>-1</sup> ) x feeding period |         |                     |        |        |       |                    |

|                                                           |        |       |        |       |          |           |
|-----------------------------------------------------------|--------|-------|--------|-------|----------|-----------|
| fasted                                                    | 47.983 | 9.066 | 105.54 | 5.29  | < 0.0001 |           |
| refed                                                     | 30.247 | 8.278 | 109.84 | 3.65  | 0.0004   |           |
| <b>log PMR (log mg O<sub>2</sub> h<sup>-1</sup>)</b>      |        |       |        |       |          |           |
| intercept                                                 | 0.053  | 0.066 | 89.59  | 0.80  | 0.425    | 0.98      |
| 0.98                                                      |        |       |        |       |          |           |
| log mass log (g)                                          | 0.313  | 0.091 | 98.14  | 3.44  | < 0.001  |           |
| log SMR (log mg O <sub>2</sub> h <sup>-1</sup> )          | 0.017  | 0.079 | 104.99 | 0.25  | 0.807    |           |
| log MMR (log mg O <sub>2</sub> h <sup>-1</sup> )          | 0.053  | 0.042 | 101.49 | 1.26  | 0.212    |           |
| feeding period                                            |        |       |        |       |          |           |
| fasted                                                    | -0.070 | 0.036 | 105.07 | -1.91 | 0.059    |           |
| refed                                                     | 0.136  | 0.026 | 109.84 | 5.12  | < 0.0001 |           |
| log SMR (log mg O <sub>2</sub> h <sup>-1</sup> ) x period |        |       |        |       |          |           |
| fasted                                                    | 0.319  | 0.105 | 104.20 | 3.05  | 0.003    |           |
| refed                                                     | 0.552  | 0.096 | 109.59 | 5.77  | < 0.0001 |           |
| <b>log PMS (log mg O<sub>2</sub> h<sup>-1</sup>)</b>      |        |       |        |       |          |           |
| intercept                                                 | -0.444 | 0.109 | 82.76  | -4.06 | 0.0001   | 0.95 0.95 |
| log mass (log g)                                          | 0.551  | 0.151 | 92.64  | 3.64  | 0.0005   |           |
| log SMR (log mg O <sub>2</sub> h <sup>-1</sup> )          | -1.021 | 0.121 | 108.18 | -8.42 | < 0.0001 |           |
| log MMR (log mg O <sub>2</sub> h <sup>-1</sup> )          | 0.062  | 0.072 | 105.54 | 0.86  | 0.393    |           |
| feeding period                                            |        |       |        |       |          |           |
| fasted                                                    | -0.037 | 0.062 | 108.14 | -0.60 | 0.553    |           |
| refed                                                     | 0.238  | 0.045 | 108.89 | 5.32  | < 0.0001 |           |
| log SMR (log mg O <sub>2</sub> h <sup>-1</sup> ) x period |        |       |        |       |          |           |
| fasted                                                    | 1.065  | 0.179 | 107.64 | 5.95  | < 0.0001 |           |
| refed                                                     | 1.334  | 0.162 | 109.96 | 8.21  | < 0.0001 |           |
| <b>log MMR (log mg O<sub>2</sub> h<sup>-1</sup>)</b>      |        |       |        |       |          |           |
| intercept                                                 | -0.168 | 0.121 | 113.00 | -1.39 | 0.168    | 0.76 0.75 |
| log mass (log g)                                          | 0.799  | 0.155 | 113.00 | 5.14  | < 0.0001 |           |

|                                                      |        |       |        |       |         |      |      |
|------------------------------------------------------|--------|-------|--------|-------|---------|------|------|
| log SMR (log mg O <sub>2</sub> h <sup>-1</sup> )     | -0.048 | 0.101 | 113.00 | -0.48 | 0.634   |      |      |
| feeding period                                       |        |       |        |       |         |      |      |
| fasted                                               | -0.147 | 0.046 | 113.00 | -3.19 | 0.002   |      |      |
| refed                                                | -0.096 | 0.056 | 113.00 | -1.72 | 0.088   |      |      |
| <b>log AAS (log mg O<sub>2</sub> h<sup>-1</sup>)</b> |        |       |        |       |         |      |      |
| intercept                                            | -0.465 | 0.259 | 100.97 | -1.80 | 0.075   | 0.11 | 0.18 |
| log mass (log g)                                     | 0.909  | 0.331 | 100.71 | 2.74  | 0.007   |      |      |
| log SMR (log mg O <sub>2</sub> h <sup>-1</sup> )     | -0.731 | 0.212 | 111.46 | -3.45 | < 0.001 |      |      |
| feeding period                                       |        |       |        |       |         |      |      |
| fasted                                               | -0.334 | 0.096 | 112.55 | -3.48 | < 0.001 |      |      |
| refed                                                | -0.064 | 0.118 | 106.17 | -0.54 | 0.590   |      |      |

SMR: standard metabolic rate (mg O<sub>2</sub> h<sup>-1</sup>); MMR: maximum metabolic rate (mg O<sub>2</sub> h<sup>-1</sup>); AAS: absolute aerobic scope (mg O<sub>2</sub> h<sup>-1</sup>); FAS: factorial aerobic scope; PMR: peak metabolic rate after feeding (mg O<sub>2</sub> h<sup>-1</sup>); PMS: peak metabolic scope (mg O<sub>2</sub> h<sup>-1</sup>); SDA: specific dynamic action (mg O<sub>2</sub>); SDA duration (h)

**TABLE S3.** Results of linear mixed effects models examining the effects of mass and feeding period on log oxygen uptake ( $\log \text{mg O}_2 \text{ h}^{-1}$ ) during swimming in Southern catfish ( $n = 40$ ). Each individual was measured for each response variable three times: (1) initial values at the beginning of the study; (2) after 15 days of food deprivation; and (3) after another 15 days or refeeding (daily to satiation). For feeding period, the reference level is initial values for each response variable. To account for repeated measures, fish ID is included as a random effect in the model. Two models are presented: the first considers swimming speed relative to fish size ( $\text{BL s}^{-1}$ ) while the second considers speed in absolute terms ( $\text{cm s}^{-1}$ ).

|                              | estimate | s.e.  | df      | t      | p        | $r^2_m$     |
|------------------------------|----------|-------|---------|--------|----------|-------------|
|                              | $r^2_c$  |       |         |        |          |             |
| <b>Relative Speed</b>        |          |       |         |        |          |             |
| intercept                    | -1.308   | 0.061 | 203.60  | -21.53 | < 0.0001 | 0.817 0.840 |
| log mass (log g)             | 0.699    |       | 0.084   | 204.20 | 8.36     | < 0.0001    |
| speed ( $\text{BL s}^{-1}$ ) | 0.010    |       | < 0.001 | 360.90 | 18.66    | < 0.0001    |
| feeding period               |          |       |         |        |          |             |
| fasted                       | -0.201   | 0.019 | 342.00  | -16.47 | < 0.001  |             |
| refed                        | -1.942   | 0.432 | 222.20  | -4.50  | < 0.0001 |             |
| <b>Absolute Speed</b>        |          |       |         |        |          |             |
| intercept                    | -6.134   | 0.060 | 200.60  | -10.16 | < 0.0001 | 0.720 0.755 |
| log mass (log g)             | 1.015    |       | 0.080   | 200.90 | 12.22    | < 0.0001    |
| speed ( $\text{cm s}^{-1}$ ) | 0.010    |       | < 0.001 | 361.20 | 18.66    | < 0.0001    |
| feeding period               |          |       |         |        |          |             |
| fasted                       | -0.169   | 0.011 | 342.10  | -14.20 | < 0.001  |             |
| refed                        | -0.168   | 0.043 | 219.00  | -3.92  | < 0.0001 |             |

**TABLE S4.** Results of linear mixed effects models examining the effects of metabolic traits on critical swimming speed ( $U_{crit}$ ) in Southern catfish ( $n = 40$ ), measured in relative (body length  $s^{-1}$ ) and absolute terms ( $cm s^{-1}$ ). Each individual was measured for each response variable three times: (1) initial values at the beginning of the study; (2) after 15 days of food deprivation; and (3) after another 15 days or refeeding (daily to satiation). For feeding period, the reference level is initial values for each response variable. To account for repeated measures, fish ID is included as a random effect in the model.

|                                                       | $r^2_m$ | $r^2_c$ | estimate | s.e.   | df     | t      | p              |
|-------------------------------------------------------|---------|---------|----------|--------|--------|--------|----------------|
| <b><math>U_{crit}</math> (BL <math>s^{-1}</math>)</b> |         |         |          |        |        |        |                |
| intercept                                             |         |         |          | 6.612  | 0.887  | 111.98 | 7.46 < 0.0001  |
|                                                       | 0.21    | 0.48    |          |        |        |        |                |
| log mass (log g)                                      |         |         | -5.268   | 1.221  | 110.31 | -4.32  | < 0.0001       |
| log SMR (log $mg O_2 h^{-1}$ )                        |         |         | -0.139   | 0.698  | 106.35 | -0.20  | 0.843          |
| log MMR (log $mg O_2 h^{-1}$ )                        |         |         | 2.338    | 0.617  | 91.27  | 3.9    | 0.0003         |
| feeding period                                        |         |         |          |        |        |        |                |
| fasted                                                |         |         |          | -0.341 | 0.320  | 96.24  | -1.07 0.288    |
| refed                                                 |         |         | 0.161    | 0.403  | 111.58 | 0.40   | 0.689          |
| <b><math>U_{crit}</math> (cm <math>s^{-1}</math>)</b> |         |         |          |        |        |        |                |
| intercept                                             |         |         |          | 47.178 | 8.153  | 111.94 | 5.786 < 0.0001 |
|                                                       | 0.21    | 0.48    |          |        |        |        |                |
| log mass (log g)                                      |         |         | -35.487  | 11.217 | 110.00 | -3.164 | < 0.002        |
| log SMR (log $mg O_2 h^{-1}$ )                        |         |         | -2.775   | 6.417  | 105.78 | -0.432 | 0.666          |
| log MMR (log $mg O_2 h^{-1}$ )                        |         |         | 21.281   | 5.657  | 90.47  | 3.762  | 0.0003         |
| feeding period                                        |         |         |          |        |        |        |                |
| fasted                                                |         |         |          | -0.217 | 2.932  | 95.51  | -0.074 0.941   |
| refed                                                 |         |         | 6.644    | 3.703  | 111.41 | 1.794  | 0.076          |

SMR: standard metabolic rate ( $mg O_2 h^{-1}$ ); MMR: maximum metabolic rate ( $mg O_2 h^{-1}$ )

**TABLE S5.** Results of general linear models examining the effects of growth rate on the percentage change in critical swimming speed (body lengths per second;  $U_{crit}$ ) after the 15 day recovery period after food-deprivation mass in Southern catfish (n = 40).

| $r^2$                              | estimate | s.e.   | df | t      | p      |
|------------------------------------|----------|--------|----|--------|--------|
| <b>All data - mass</b>             |          |        |    |        |        |
| intercept<br>0.27                  | 61.410   | 19.501 |    | 3.149  | 0.0033 |
| mass growth (% d <sup>-1</sup> )   | -9.581   | 2.601  | 36 | -3.684 | 0.0008 |
| <b>All data - length</b>           |          |        |    |        |        |
| intercept<br>0.21                  | 50.204   | 19.065 |    | 2.633  | 0.0124 |
| length growth (% d <sup>-1</sup> ) | -26.325  | 8.289  | 36 | -3.176 | 0.0031 |
| <b>Outlier removed - mass</b>      |          |        |    |        |        |
| intercept<br>0.12                  | 31.096   | 20.070 |    | 1.549  | 0.1303 |
| mass growth (% d <sup>-1</sup> )   | -5.732   | 2.647  | 35 | -2.166 | 0.0372 |
| <b>Outlier removed - length</b>    |          |        |    |        |        |
| intercept<br>0.07                  | 19.327   | 19.463 |    | 0.993  | 0.328  |
| length growth (% d <sup>-1</sup> ) | -13.563  | 8.363  | 35 | -1.622 | 0.114  |
